# Supplementary material for: Reciprocal control of motility and biofilm formation by the PdhS2 two-component sensor kinase of Agrobacterium tumefaciens
Source: PubMed Central journal article supplement (PMC7003649; doi:10.1099/mic.0.000758), 2019-01-08

## SUPPLEMENTARY MATERIAL

### **Reciprocal control of motility and biofilm formation by the PdhS2**

#### **two-component sensor kinase of *Agrobacterium tumefaciens***

Jason E. Heindl, Daniel Crosby, Sukhdev Brar, John F. Pinto, Tiyan Singletary, Daniel Merenich, Justin L. Eagan, Aaron M. Buechlein, Eric L. Bruger, Christopher M. Waters and Clay Fuqua

Running title: *Agrobacterium PdhS2 regulates motility and biofilms*

1) Supplementary Figures – S1-S8

2) Supplementary Figure Legends

3) Supplementary Tables – S1-S3

4) Supplementary References

**Figure S1. A combined kinase- and phosphatase-null PdhS2 mutant allele has little effect on biofilm formation or swimming motility.** The ability of plasmid-borne expression of a kinase- and phosphatase- null allele of *pdhS2* (*p-pdhS2* (K<sup>-</sup>P<sup>-</sup>)) to complement the  $\Delta pdhS2$  phenotypes was compared against the wild-type *pdhS2* allele (*p-pdhS2*). Biofilm formation (black bars) and swimming motility (white bars) were evaluated as in Figure 2. (a) =  $P < 0.05$  compared to the wild-type background with vector only; (b) =  $P < 0.05$  compared to the  $\Delta pdhS2$  background with vector only. Statistical significance was determined using Student's *t* test.

**Figure S2. Morphology of WT,  $\Delta divK$ ,  $\Delta pdhS2$ , and  $\Delta divK \Delta pdhS2$  strains.** Strains were grown to exponential phase in ATGN. Aliquots of cells were placed on top of an ATGN/1% agarose pad and imaged using phase contrast microscopy. (A), WT; (B)  $\Delta divK$ ; (C)  $\Delta pdhS2$ ; (D)  $\Delta divK \Delta pdhS2$ . Representative images are shown. Scale bar = 10  $\mu$ m.

**Figure S3. PleD regulation of swimming motility is epistatic to PleC.** Swimming motility of the wild-type (WT) and indicated mutant strains was evaluated as described in Figure 2. (\*)  $P < 0.05$  compared to all strains.

**Figure S4. Predicted CtrA-dependent promoters bearing one or more CtrA binding motifs.** Promoter regions from select genes whose expression is upregulated (red) or downregulated (black) in the  $\Delta pdhS2$  mutant background relative to the wild-type background. Predicted CtrA binding sites, as defined in the main text, are

indicated. Only those genes with a predicted full CtrA binding site are shown.

Expression levels were determined either via microarray expression profiling or beta-galactosidase translational reporters (Tables 1 and 2 in the main text).

**Figure S5. PdhS2 regulation of swimming motility is independent of diguanylate cyclase activity.** Swimming motility of the wild-type (WT) and indicated mutant strains was evaluated as described in Figure 2.  $P < 0.05$  compared to WT <sup>(a)</sup>,  $\Delta pdhS2$  <sup>(b)</sup>, or corresponding diguanylate cyclase mutant <sup>(c)</sup>.

**Figure S6. PdhS2 does not affect global levels of cyclic-di-GMP.** Cyclic-di-GMP levels were measured in whole cell extracts from equivalent ODs of the indicated strains. Data are from three independent experiments (N = 3).

**Figure S7. A catalytically inactive DgcB modestly affects swimming motility.** The effect on swimming motility of plasmid-borne expression of wild-type *dgcB* (p-*dgcB*) or a catalytic mutant allele of *dgcB* (p-*dgcB*<sup>\*</sup>) was evaluated. Expression of each *dgcB* allele was driven by the  $P_{lac}$  promoter. Swimming motility was evaluated as described in Figure 2. (\*) =  $P < 0.05$  compared to vector alone.

**Figure S8. PdhS2 and DivJ are polarly localized in *A. tumefaciens*.** Time-lapse microscopy of a C-terminal green fluorescent protein fusion to PdhS2 (A) and DivJ (B). Overlaid phase and fluorescent images, acquired sequentially on Nikon E800

fluorescence microscope with a CCD camera using the 100 X objective. Time between panels is 40 minutes. To the right of each image is a cartoon interpretation of the image.

**Table S1. Strains used in this study**

| <b>Species</b>        | <b>Strain</b> | <b>Relevant Characteristics</b>                                                                                                                                                               | <b>Source</b> |
|-----------------------|---------------|-----------------------------------------------------------------------------------------------------------------------------------------------------------------------------------------------|---------------|
| <i>A. tumefaciens</i> | C58           | Nopaline type strain, pAtC58, pTiC58                                                                                                                                                          | [1]           |
| <i>A. tumefaciens</i> | C58-JE001     | $\Delta dgcB \Delta pdhS2 \Delta pleD$ ( $\Delta Atu1691 \Delta Atu1888 \Delta Atu1297$ )                                                                                                     | This study    |
| <i>A. tumefaciens</i> | C58-JE002     | $\Delta dgcB \Delta pleD$ ( $\Delta Atu1691 \Delta Atu1297$ )                                                                                                                                 | This study    |
| <i>A. tumefaciens</i> | C58-JEH076    | $\Delta pdhS2$ ( $\Delta Atu1888$ )                                                                                                                                                           | [2]           |
| <i>A. tumefaciens</i> | C58-JEH128    | $\Delta pdhS2 \Delta pleD$ ( $\Delta Atu1888 \Delta Atu1297$ )                                                                                                                                | This study    |
| <i>A. tumefaciens</i> | C58-JEH130    | $\Delta pdhS2 \Delta dgcA$ ( $\Delta Atu1888 \Delta Atu1257$ )                                                                                                                                | This study    |
| <i>A. tumefaciens</i> | C58-JEH131    | $\Delta pdhS2 \Delta dgcB$ ( $\Delta Atu1888 \Delta Atu1691$ )                                                                                                                                | This study    |
| <i>A. tumefaciens</i> | C58-JEH132    | $\Delta pdhS2 \Delta dgcC$ ( $\Delta Atu1888 \Delta Atu2179$ )                                                                                                                                | This study    |
| <i>A. tumefaciens</i> | C58-JEH145    | $\Delta pdhS2 \Delta pleC$ ( $\Delta Atu1888 \Delta Atu0982$ )                                                                                                                                | This study    |
| <i>A. tumefaciens</i> | C58-JEH146    | $\Delta pdhS2 \Delta crdS \Delta chvAB \Delta cel \Delta upp \Delta exoA$ ( $\Delta Atu1888 \Delta Atu3055-3057 \Delta Atu2728-2730 \Delta Atu3302-8187 \Delta Atu1235-1240 \Delta Atu4053$ ) | This study    |

|                       |            |                                                                                                               |            |
|-----------------------|------------|---------------------------------------------------------------------------------------------------------------|------------|
| <i>A. tumefaciens</i> | C58-JEH147 | $\Delta pdhS2 \Delta upp$ ( $\Delta Atu1888 \Delta Atu1235-1240$ )                                            | This study |
| <i>A. tumefaciens</i> | C58-JEH148 | $\Delta pdhS2 \Delta cel$ ( $\Delta Atu1888 \Delta Atu3302-8187$ )                                            | This study |
| <i>A. tumefaciens</i> | C58-JEH149 | $\Delta pdhS2 \Delta crdS$ ( $\Delta Atu1888 \Delta Atu3055-3057$ )                                           | This study |
| <i>A. tumefaciens</i> | C58-JEH150 | $\Delta pdhS2 \Delta chvAB$ ( $\Delta Atu1888 \Delta Atu2728-Atu2730$ )                                       | This study |
| <i>A. tumefaciens</i> | C58-JEH151 | $\Delta pdhS2 \Delta exoA$ ( $\Delta Atu1888 \Delta Atu4053$ )                                                | This study |
| <i>A. tumefaciens</i> | C58-JEH153 | $\Delta divK \Delta pdhS2$ ( $\Delta Atu1296 \Delta Atu1888$ )                                                | This study |
| <i>A. tumefaciens</i> | C58-JW2    | $\Delta pleC$ ( $\Delta Atu0982$ )                                                                            | [2]        |
| <i>A. tumefaciens</i> | C58-JW7    | $\Delta divK$ ( $\Delta Atu1296$ )                                                                            | [2]        |
| <i>A. tumefaciens</i> | C58-JW8    | $\Delta pleD$ ( $\Delta Atu1297$ )                                                                            | [2]        |
| <i>A. tumefaciens</i> | C58-JX100  | $\Delta crdS$ ( $\Delta Atu3055-3057$ )                                                                       | [3]        |
| <i>A. tumefaciens</i> | C58-JX101  | $\Delta chvAB$ ( $\Delta Atu2728-2730$ )                                                                      | [3]        |
| <i>A. tumefaciens</i> | C58-JX102  | $\Delta cel$ ( $\Delta Atu3302-8187$ )                                                                        | [3]        |
| <i>A. tumefaciens</i> | C58-JX111  | $\Delta crdS \Delta chvAB \Delta cel \Delta upp \Delta exoA$<br>( $\Delta Atu3055-3057 \Delta Atu2728-2730$ ) | [3]        |

|                       |                     |                                                                                                                                                                                                                                                                                                   |                          |
|-----------------------|---------------------|---------------------------------------------------------------------------------------------------------------------------------------------------------------------------------------------------------------------------------------------------------------------------------------------------|--------------------------|
|                       |                     | $\Delta$ Atu3302-8187 $\Delta$ Atu1235-1240<br>$\Delta$ Atu4053; "EPS-")                                                                                                                                                                                                                          |                          |
| <i>A. tumefaciens</i> | C58-JX125           | $\Delta$ dgcA ( $\Delta$ Atu1257)                                                                                                                                                                                                                                                                 | [4]                      |
| <i>A. tumefaciens</i> | C58-JX187           | $\Delta$ dgcB ( $\Delta$ Atu1691)                                                                                                                                                                                                                                                                 | [4]                      |
| <i>A. tumefaciens</i> | C58-MLL2 A          | $\Delta$ exoA ( $\Delta$ Atu4053)                                                                                                                                                                                                                                                                 | [5]                      |
| <i>A. tumefaciens</i> | C58-PMM26           | $\Delta$ upp ( $\Delta$ Atu1235-1240)                                                                                                                                                                                                                                                             | [3]                      |
| <i>A. tumefaciens</i> | C58-YW010           | $\Delta$ dgcC ( $\Delta$ Atu2179)                                                                                                                                                                                                                                                                 | [4]                      |
|                       |                     |                                                                                                                                                                                                                                                                                                   |                          |
| <i>E. coli</i>        | S17-1 $\lambda$ pir | RK2 <i>tra</i> regulon, <i>pir</i> , host for <i>pir</i> -dependent plasmids                                                                                                                                                                                                                      | [6]                      |
| <i>E. coli</i>        | TOP10 F'            | F' <i>lacI</i> <sup>q</sup> Tn10 (Tet <sup>R</sup> ) <i>mcrA</i> $\Delta$ ( <i>mrr</i> - <i>hsdRMS</i> - <i>mcrBC</i> ) $\Phi$ 80 <i>lacZ</i> $\Delta$ M15<br>$\Delta$ <i>lacX74</i> <i>recA1</i> <i>araD139</i> $\Delta$ ( <i>ara-leu</i> )7697 <i>galU</i> <i>rpsL</i> <i>endA1</i> <i>nupG</i> | Thermo Fisher Scientific |

**Table S2. Plasmids used in this study**

| <b>Plasmid name</b> | <b>Relevant characteristics</b>                                                                                                   | <b>Source</b>    |
|---------------------|-----------------------------------------------------------------------------------------------------------------------------------|------------------|
| pGEM-T Easy         | PCR cloning vector; Amp <sup>R</sup>                                                                                              | Promega          |
| <i>placZ/290</i>    | Broad host range plasmid carrying promoterless <i>lacZ</i> for transcriptional fusions; Tet <sup>R</sup>                          | [7]              |
| pNPTS138            | ColE1 origin; <i>sacB</i> ; Km <sup>R</sup>                                                                                       | gift of M. Alley |
| pRA301              | Broad host range plasmid carrying promoterless <i>lacZ</i> for translational fusions; Spec <sup>R</sup>                           | [8]              |
| pSRKGm              | Broad host range vector containing P <sub><i>lac</i></sub> ; <i>lacI<sup>q</sup></i> ; <i>lacZα<sup>+</sup></i> ; Gm <sup>R</sup> | [9]              |
| <i>pctrA290</i>     | <i>placZ/290</i> derivative with <i>C. crescentus ctrA</i> promoter                                                               | [10]             |
| pDC001              | pGEM-T Easy with full-length <i>pdhS2</i> <sup>(CA811-812GC, A823G)</sup> ( <i>PdhS2</i> <sup>His271A,Thr275Ala</sup> mutant)     | This study       |



|         |                                                                                                                     |            |
|---------|---------------------------------------------------------------------------------------------------------------------|------------|
| pDC002  | pSRKGm with full-length <i>pdhS2</i> <sup>(CA811-812GC, A823G)</sup><br>(PdhS2 <sup>His271A,Thr275Ala</sup> mutant) | This study |
| pGZ22   | <i>lacZ</i> /290 derivative with <i>C. crescentus ccrM</i> promoter                                                 | [11]       |
| pJEH010 | pSRKGm with full-length wild-type <i>cckA</i>                                                                       | [2]        |
| pJEH021 | pGEM-T Easy with full-length <i>pdhS2</i>                                                                           | [2]        |
| pJEH026 | pSRKGm with full-length <i>pdhS2</i>                                                                                | [2]        |
| pJEH030 | pSRKGm with full-length Y674D <i>cckA</i> allele                                                                    | [2]        |
| pJEH040 | pNPTS138 derivative with <i>pdhS2</i> SOE deletion fragment                                                         | [2]        |
| pJEH052 | pGEM-T Easy with <i>pdhS2</i> lacking a stop codon                                                                  | This study |
| pJEH053 | pGEM-T Easy with <i>gfpmut3</i>                                                                                     | This study |

|         |                                                                                                        |            |
|---------|--------------------------------------------------------------------------------------------------------|------------|
| pJEH054 | pGEM-T Easy with <i>divJ</i> lacking a stop codon                                                      | This study |
| pJEH060 | pSRKGm with a <i>pdhS2::gfpmut3</i> translational fusion                                               | This study |
| pJEH078 | pSRKGm with a <i>divJ::gfpmut3</i> translational fusion                                                | This study |
| pJEH091 | pGEM-T Easy with full-length <i>pdhS2</i> <sup>(CA811-812GC)</sup> (PdhS2 <sup>His271Ala</sup> mutant) | This study |
| pJEH092 | pSRKGm with full-length <i>pdhS2</i> <sup>(CA811-812GC)</sup> (PdhS2 <sup>His271Ala</sup> mutant)      | This study |
| pJEH099 | pGEM-T Easy with full-length <i>pdhS2</i> <sup>(A823G)</sup> (PdhS2 <sup>Thr275Ala</sup> mutant)       | This study |
| pJEH102 | pSRKGm with full-length <i>pdhS2</i> <sup>(A823G)</sup> (PdhS2 <sup>Thr275Ala</sup> mutant)            | This study |
| pJEH113 | pGEM-T Easy with A. <i>tumefaciens ccrM</i> promoter                                                   | This study |

|         |                                                                                        |            |
|---------|----------------------------------------------------------------------------------------|------------|
| pJEH115 | pGEM-T Easy with <i>A. tumefaciens ctrA</i> promoter                                   | This study |
| pJEH119 | pGEM-T Easy with <i>A. tumefaciens pdhS1</i> promoter                                  | This study |
| pJEH121 | pRA301 with <i>A. tumefaciens ccrM</i> promoter                                        | This study |
| pJEH122 | pRA301 with <i>A. tumefaciens ctrA</i> promoter                                        | This study |
| pJEH124 | pRA301 with <i>A. tumefaciens pdhS1</i> promoter                                       | This study |
| pJEH141 | pRA301 with 5'-TTAA-3' → 5'-AATT-3' mutation of <i>A. tumefaciens dgcB</i> promoter    | This study |
| pJFP006 | pRA301 with 5'-TTAA-3' → 5'-AATT-3' mutation of <i>A. tumefaciens</i> Atu3318 promoter | This study |

|        |                                                                                                                  |      |
|--------|------------------------------------------------------------------------------------------------------------------|------|
| pJW109 | pNPTS138 derivative with<br><i>pleD</i> SOE deletion<br>fragment                                                 | [2]  |
| pJS70  | <i>placZ</i> /290 derivative with<br><i>C. crescentus pilA</i><br>promoter                                       | [12] |
| pJX158 | pRA301 with <i>A.</i><br><i>tumefaciens</i> Atu3318<br>promoter                                                  | [4]  |
| pJX162 | pRA301 with <i>A.</i><br><i>tumefaciens dgcb</i><br>promoter                                                     | [4]  |
| pJX520 | pSRKGm with full-length<br><i>dgcb</i>                                                                           | [4]  |
| pJX521 | pSRKGm with full-length<br><i>dgcb</i> <sup>A767C, A770C</sup> ( <i>DgcB</i> <sup>EE256-<br/>257AA</sup> mutant) | [4]  |
| pJX802 | pNPTS138 derivative with<br><i>dgcb</i> SOE deletion<br>fragment                                                 | [4]  |
| pJZ383 | pPZP201 derivative with<br><i>P<sub>tac</sub>::gfpmut3</i> ; Spec <sup>R</sup>                                   | [13] |

**Table S3. Primers used in this study**

| Primer | Sequence (5' – 3')                      | Use                                                                                               |
|--------|-----------------------------------------|---------------------------------------------------------------------------------------------------|
| JEH65  | GAAGA <u>ACATATGAGT</u> AAAAGCGTCAGCA   | cloning <i>pdhS2</i> with NdeI site                                                               |
| JEH85  | GATTCGCGCGATCCCTTCGA                    | Internal primer for <i>pdhS2</i> locus                                                            |
| JEH87  | GAGCAGATGCTGGCCGGA                      | Internal primer for <i>pdhS2</i> locus                                                            |
| JEH100 | GCTCTGTTGAAGGCGGCCAA                    | External primer for <i>pdhS2</i> locus                                                            |
| JEH113 | GCCGGTTTCATGCACACGCA                    | External primer for <i>pdhS2</i> locus                                                            |
| JEH146 | GAAGAAGCTAGCGGCGAAAGACCGCGG             | cloning <i>pdhS2</i> w/o STOP and with NheI site                                                  |
| JEH147 | GAAGA <u>ACATATGAGAG</u> AAAAAGCGGTCGCA | cloning <i>divJ</i> with NdeI site                                                                |
| JEH148 | GAAGAAGCTAGCGGCGATTTTCGCTTTCGCGG        | cloning <i>divJ</i> w/o STOP and with NheI site                                                   |
| JEH149 | GAAGAAGGTACCTTATTTGTATAGTTCATCCATGCCA   | cloning <i>gfpmut3</i> with KpnI site                                                             |
| JEH150 | GAAGAAGCTAGCATGAGTAAAGGAGAAGAACTT       | cloning <i>gfpmut3</i> with NheI site                                                             |
| JEH245 | CGTGCGCAGCTCGgcCGACATGGAA GCG           | <i>pdhS2</i> <sup>CA811-812GC</sup> mutagenesis                                                   |
| JEH246 | CGCTTCCATGTTCGgcCGAGCTGCGCACG           | <i>pdhS2</i> <sup>CA811-812GC</sup> mutagenesis                                                   |
| JEH261 | CGCACGAGCTGCGCgCGCCGCTCAACGC            | <i>pdhS2</i> <sup>A823G</sup> mutagenesis                                                         |
| JEH262 | GCGTTGAGCGGCGcGCGCAGCTCGTGCG            | <i>pdhS2</i> <sup>A823G</sup> mutagenesis                                                         |
| JEH282 | <u>GGTACCTGCCAGAATCGTTGCT</u>           | cloning <i>ccrM</i> promoter region, +222 bp to -9 bp from translational start, with KpnI site    |
| JEH284 | <u>AAGCTTTGCTGCCATTGGTACT</u>           | cloning <i>ccrM</i> promoter region, +222 bp to -9 bp from translational start, with HindIII site |
| JEH285 | <u>GGTACCTTAACCTTTGTTTACGGGC</u><br>A   | cloning <i>ctrA</i> promoter region, +328 bp to -9 bp from translational start, with KpnI site    |
| JEH287 | <u>CTGCAGA</u> ACCCGCATAATTATCCCCTTT    | cloning <i>ctrA</i> promoter region, +328 bp to -9 bp from                                        |

|        |                                 |                                                                                                    |
|--------|---------------------------------|----------------------------------------------------------------------------------------------------|
|        |                                 | translational start, with PstI site                                                                |
| JEH291 | <u>GGTACC</u> ATTTGCAAGTGCCTCTT | cloning <i>pdhS1</i> promoter region, +264 bp to -9 bp from translational start, with KpnI site    |
| JEH293 | <u>AAGCTT</u> GGCGGGCATGTCGAAA  | cloning <i>pdhS1</i> promoter region, +264 bp to -9 bp from translational start, with HindIII site |

## REFERENCES

1. **Watson B, Currier TC, Gordon MP, Chilton MD, Nester EW.** Plasmid required for virulence of *Agrobacterium tumefaciens*. *Journal of Bacteriology* 1975;123(1):255-264.
2. **Kim J, Heindl JE, Fuqua C.** Coordination of division and development influences complex multicellular behavior in *Agrobacterium tumefaciens*. *PLoS one* 2013;8(2):e56682. doi: 10.1371/journal.pone.0056682
3. **Xu J, Kim J, Danhorn T, Merritt PM, Fuqua C.** Phosphorus limitation increases attachment in *Agrobacterium tumefaciens* and reveals a conditional functional redundancy in adhesin biosynthesis. *Res Microbiol* 2012;163(9-10):674-684. doi: 10.1016/j.resmic.2012.10.013
4. **Xu J, Kim J, Koestler BJ, Choi JH, Waters CM et al.** Genetic analysis of *Agrobacterium tumefaciens* unipolar polysaccharide production reveals complex integrated control of the motile-to-sessile switch. *Molecular microbiology* 2013;89(5):929-948. doi: 10.1111/mmi.12321
5. **Tomlinson AD, Ramey-Hartung B, Day TW, Merritt PM, Fuqua C.** *Agrobacterium tumefaciens* ExoR represses succinoglycan biosynthesis and is required for biofilm formation and motility. *Microbiology* 2010;156(Pt 9):2670-2681. doi: 10.1099/mic.0.039032-0
6. **de Lorenzo V, Timmis KN.** Analysis and construction of stable phenotypes in Gram-negative bacteria with Tn5- and Tn10-derived minitransposons. *Methods Enzymol* 1994;235:386-405. doi: 10.1016/0076-6879(94)35157-0
7. **Gober JW, Shapiro L.** A developmentally regulated *Caulobacter* flagellar promoter is activated by 3' enhancer and IHF binding elements. *Mol Biol Cell* 1992;3(8):913-926. doi: 10.1091/mbc.3.8.913
8. **Akakura R, Winans SC.** Constitutive mutations of the OccR regulatory protein affect DNA bending in response to metabolites released from plant tumors. *The Journal of biological chemistry* 2002;277(8):5866-5874. doi: 10.1074/jbc.M110555200
9. **Khan SR, Gaines J, Roop RM, 2nd, Farrand SK.** Broad-host-range expression vectors with tightly regulated promoters and their use to examine the influence of TraR and TraM expression on Ti plasmid quorum sensing. *Applied and environmental microbiology* 2008;74(16):5053-5062. doi: 10.1128/AEM.01098-08
10. **Domian IJ, Reisenauer A, Shapiro L.** Feedback control of a master bacterial cell-cycle regulator. *Proceedings of the National Academy of Sciences of the United States of America* 1999;96(12):6648-6653. doi: 10.1073/pnas.96.12.6648

11. **Stephens CM, Zweiger G, Shapiro L.** Coordinate cell cycle control of a *Caulobacter* DNA methyltransferase and the flagellar genetic hierarchy. *Journal of bacteriology* 1995;177(7):1662-1669. doi: 10.1128/jb.177.7.1662-1669.1995
12. **Skerker JM, Shapiro L.** Identification and cell cycle control of a novel pilus system in *Caulobacter crescentus*. *The EMBO journal* 2000;19(13):3223-3234. doi: 10.1093/emboj/19.13.3223
13. **Ramey BE, Matthysse AG, Fuqua C.** The FNR-type transcriptional regulator SinR controls maturation of *Agrobacterium tumefaciens* biofilms. *Molecular microbiology* 2004;52(5):1495-1511. doi: 10.1111/j.1365-2958.2004.04079.x



Figure S1

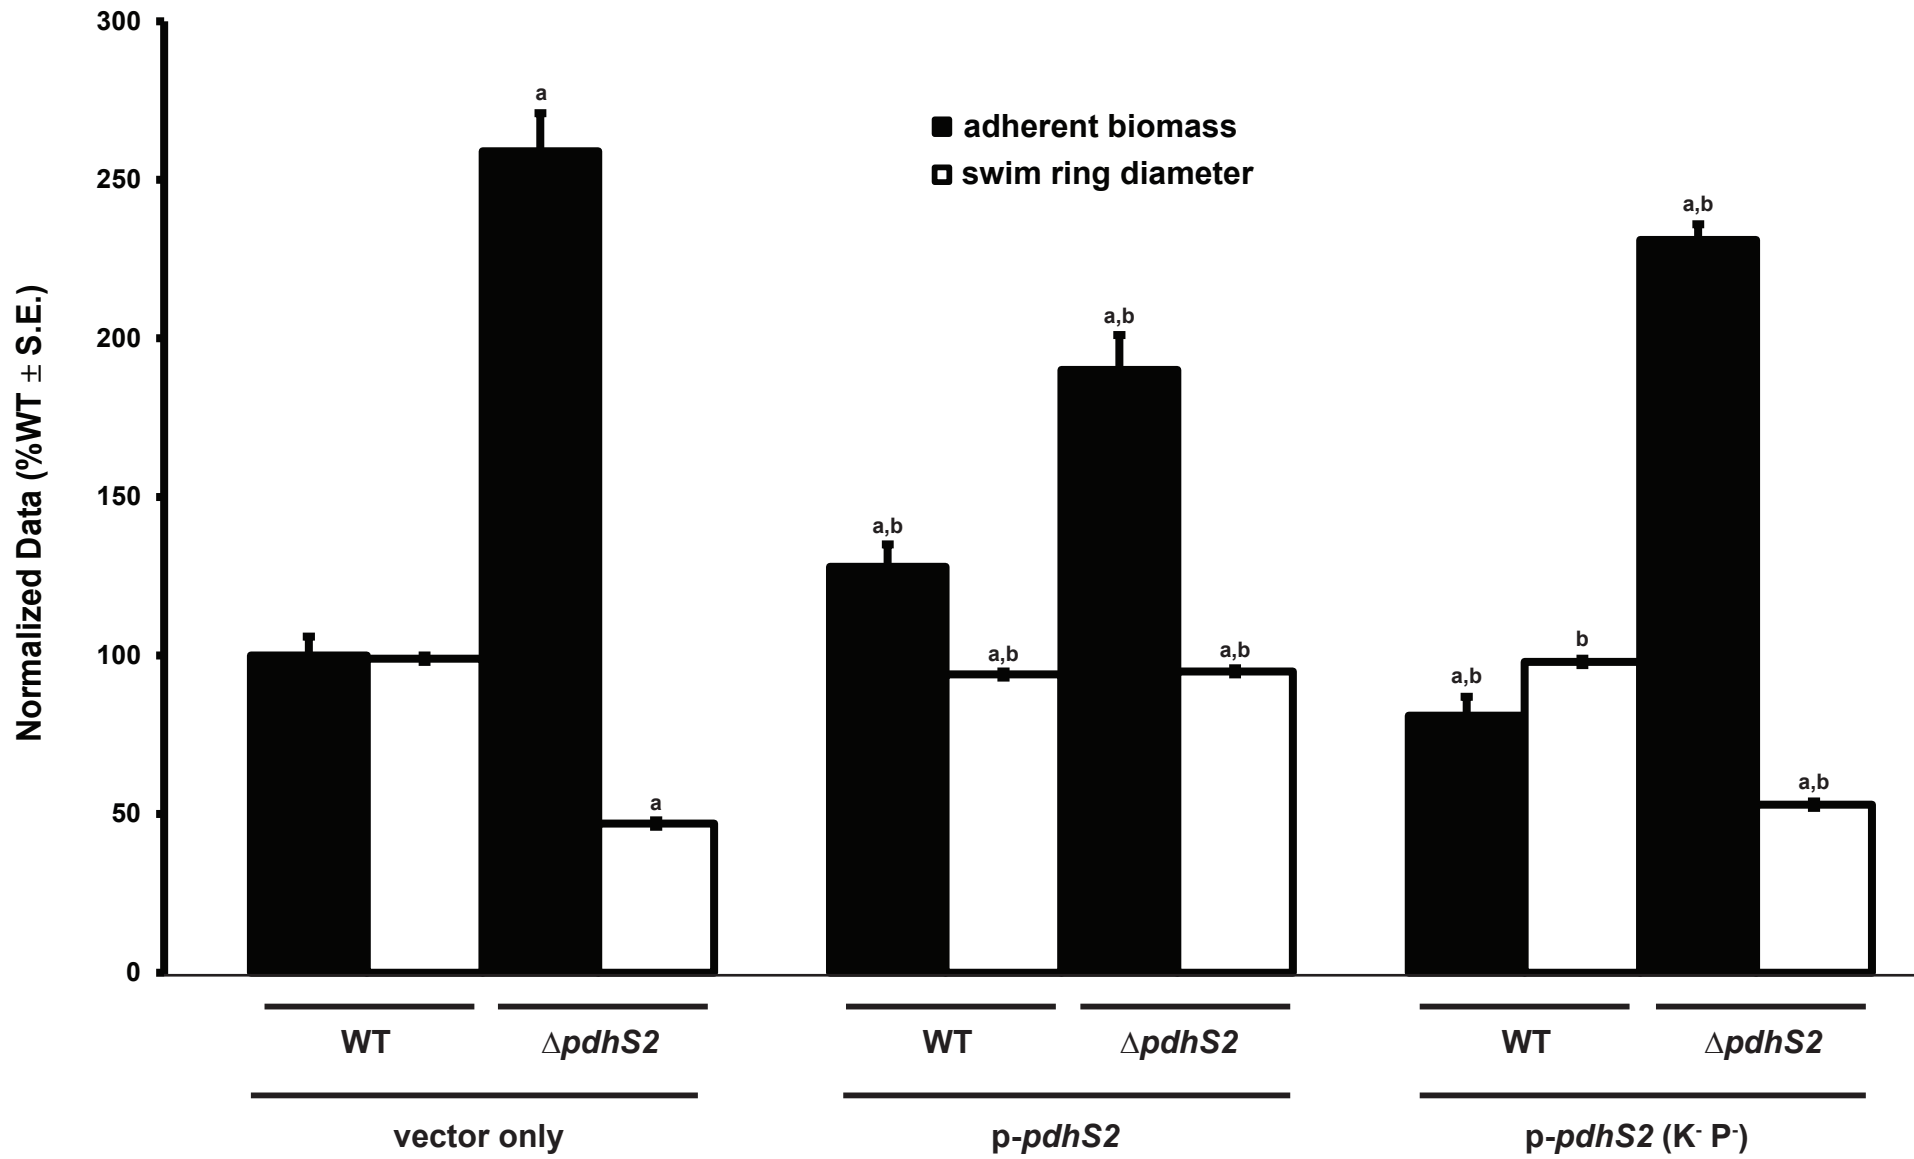

Figure S2

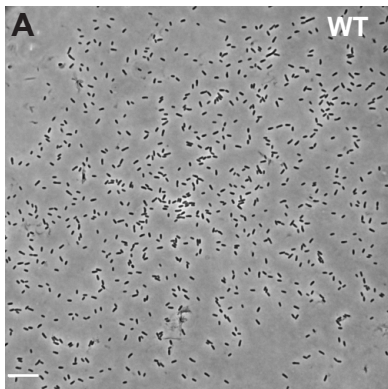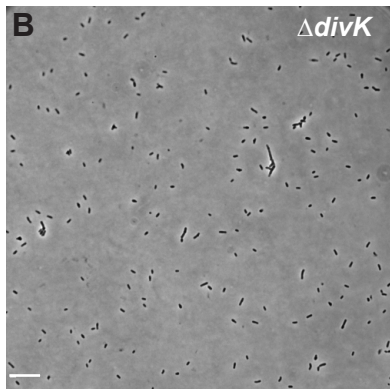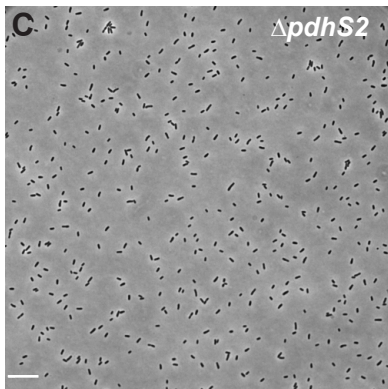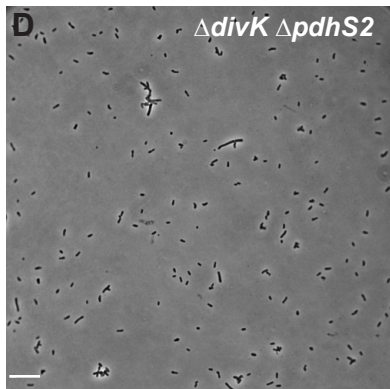

Figure S3

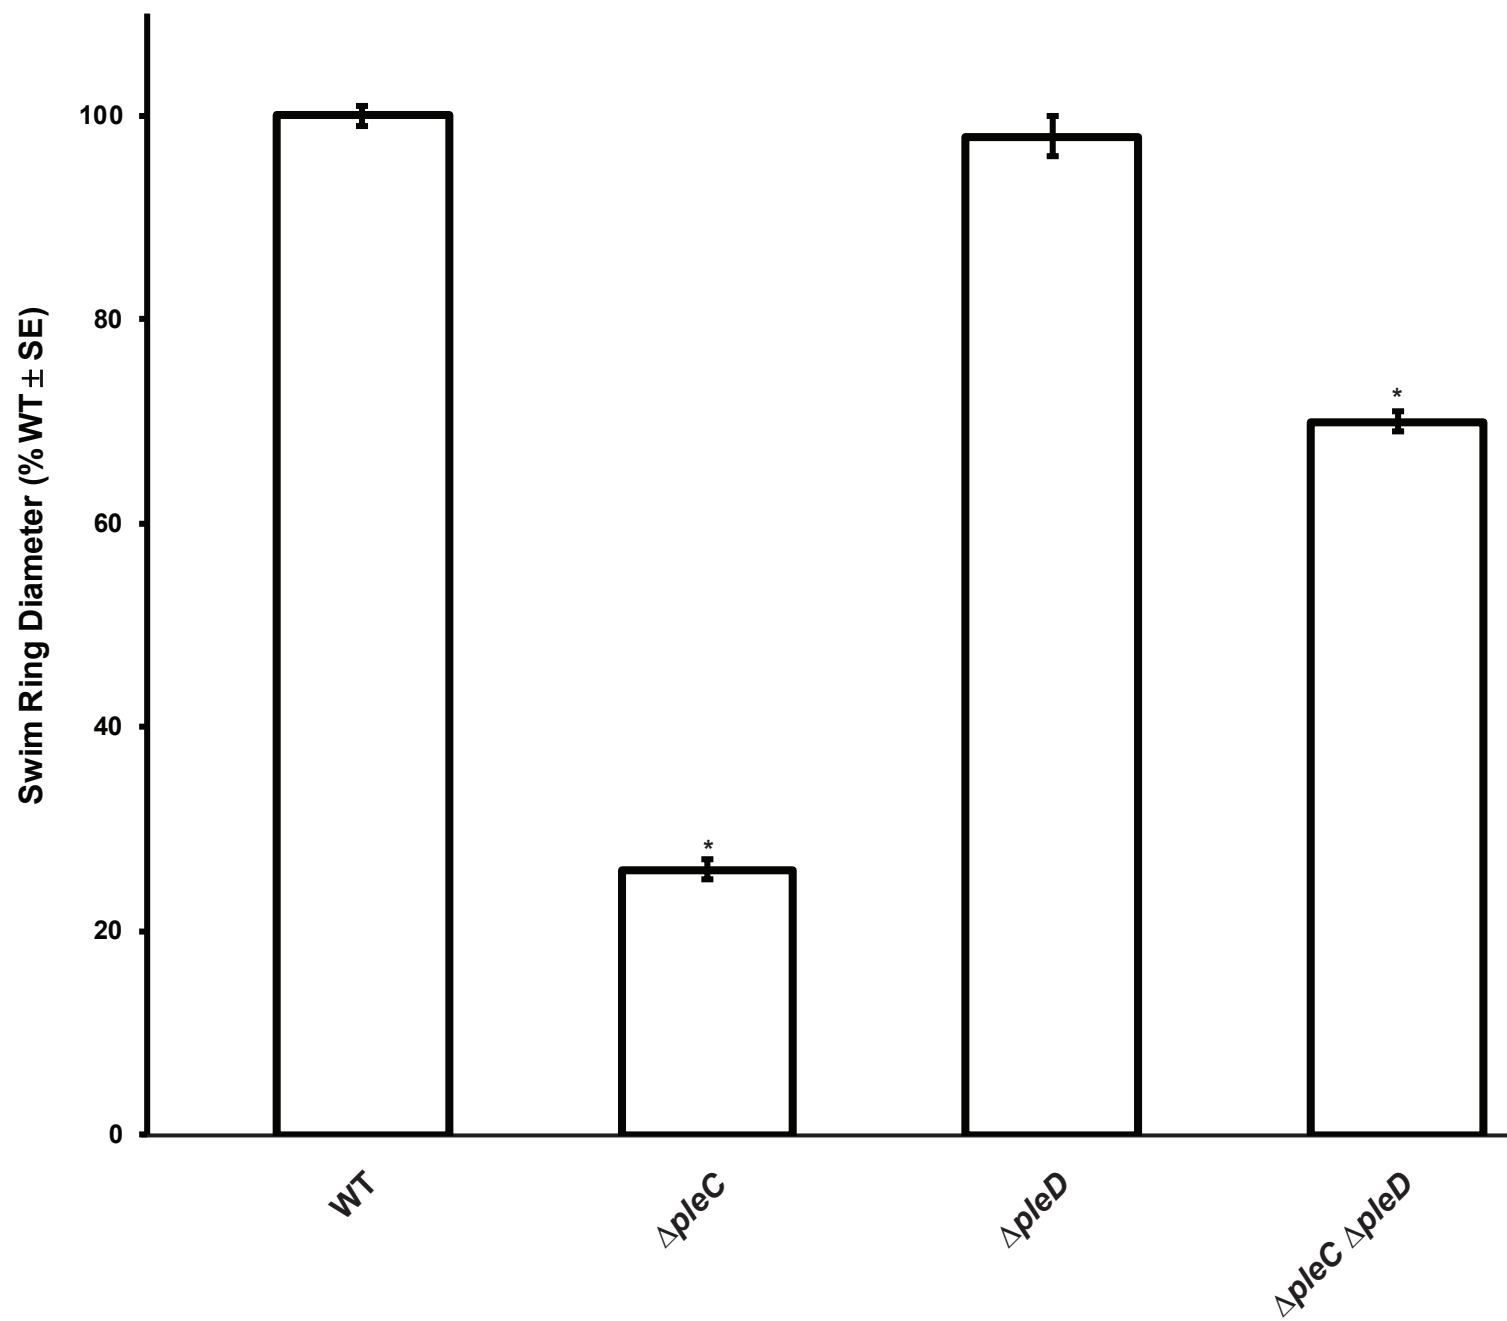

Figure S4

CtrA Binding Site Consensus

TTAANNNNNNNGTTAAC

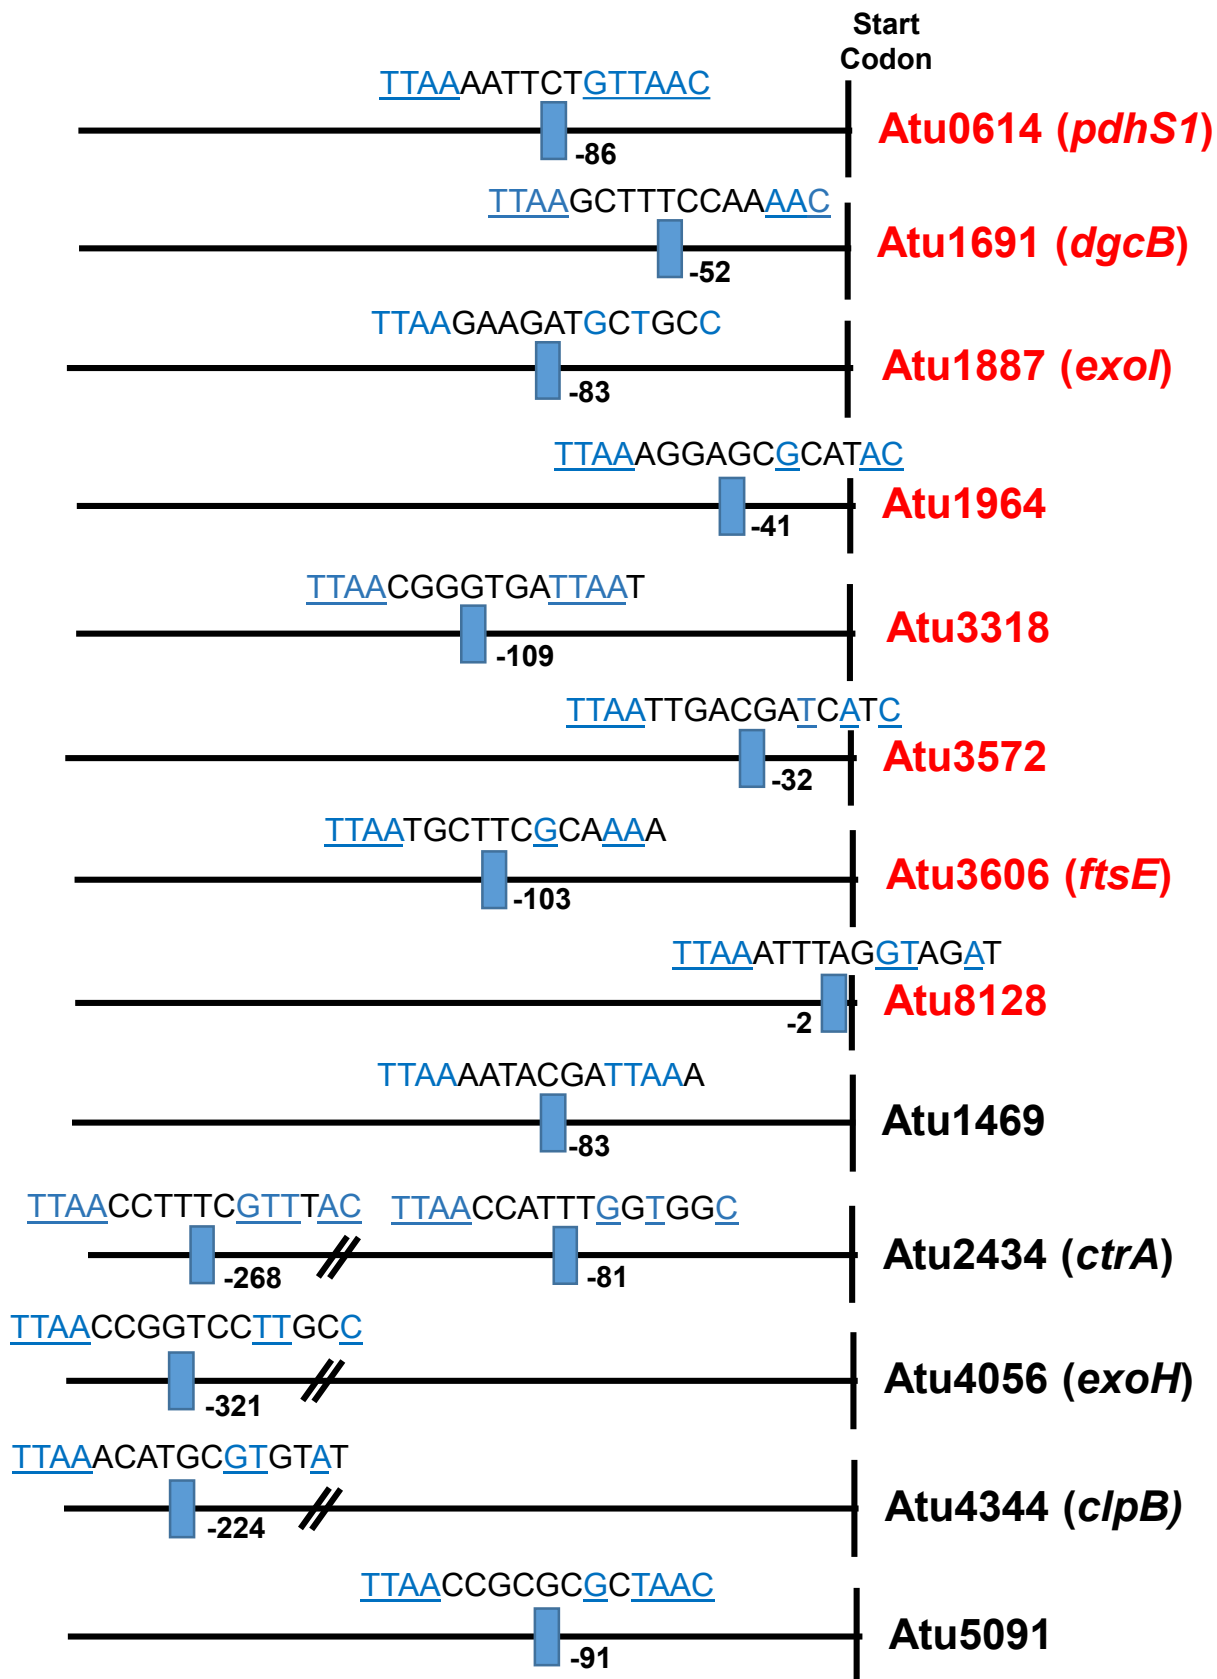

Figure S5

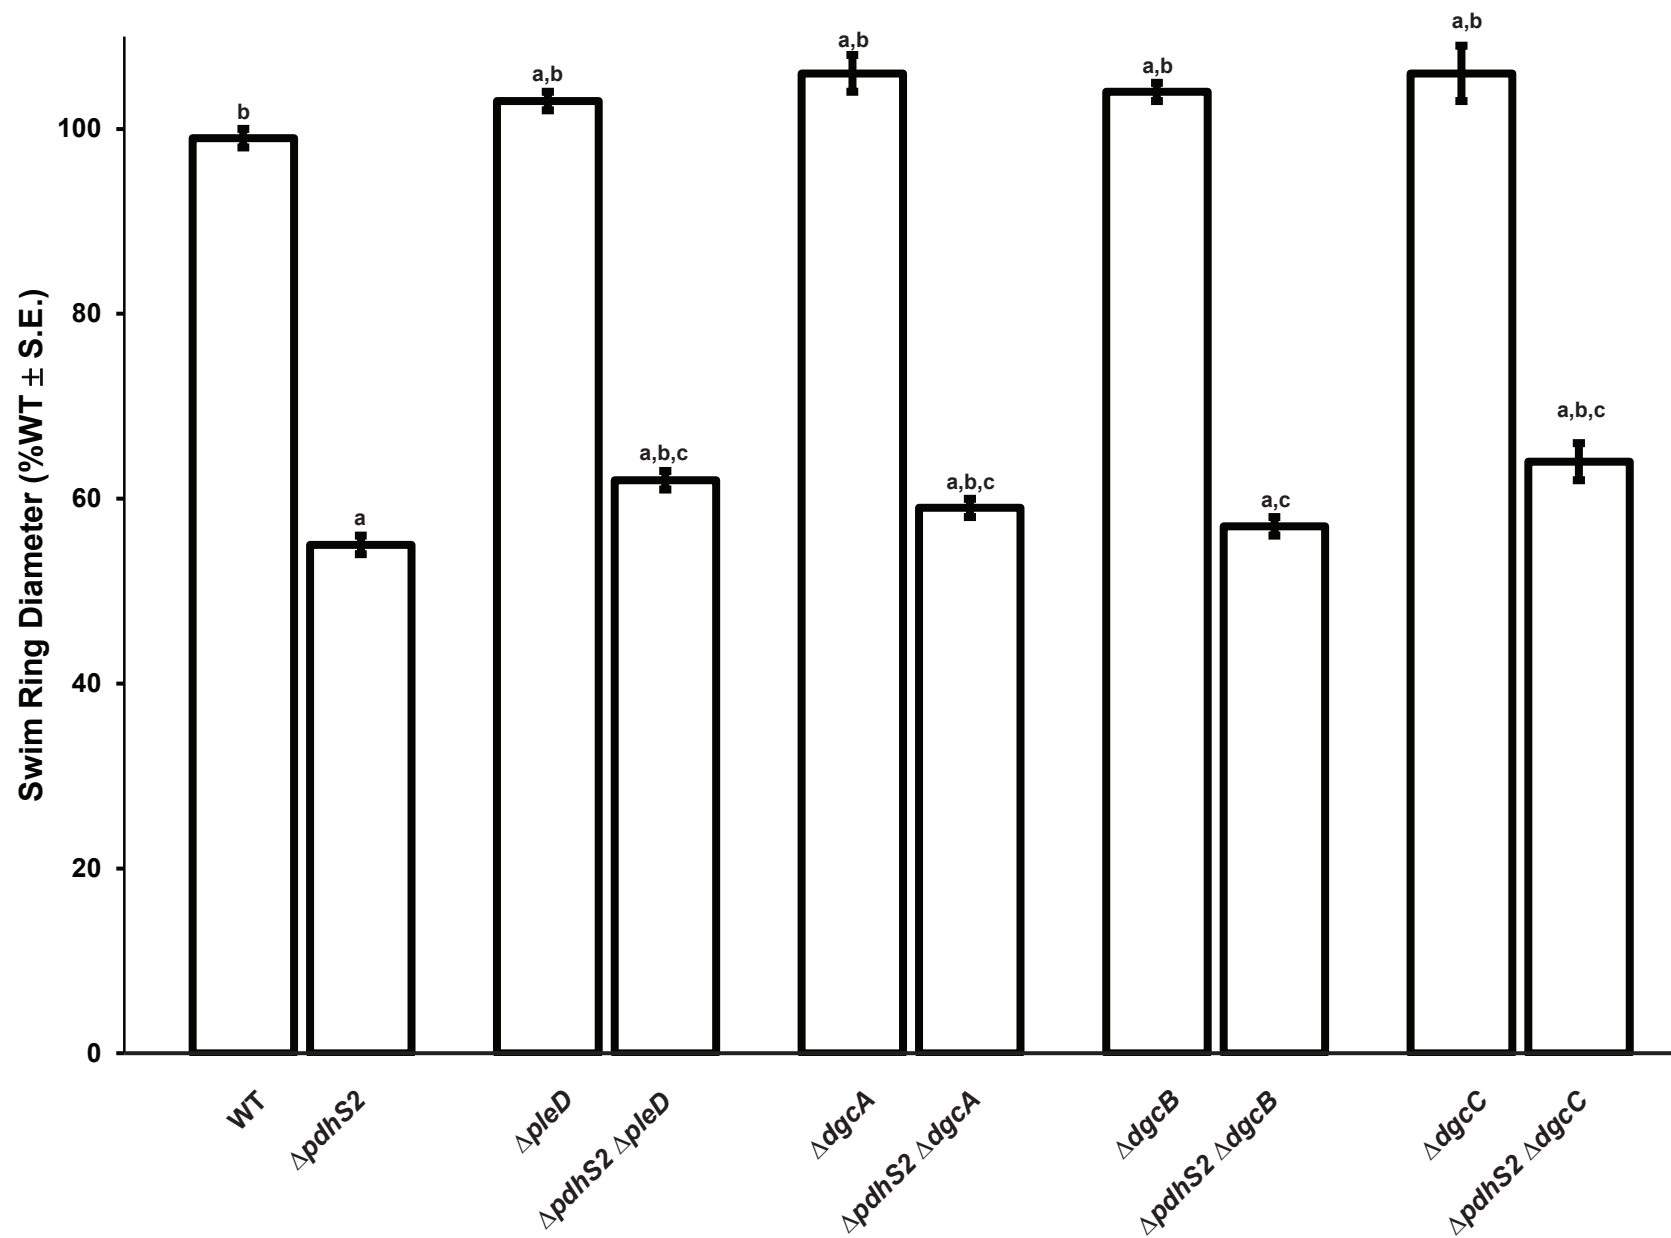

Figure S6

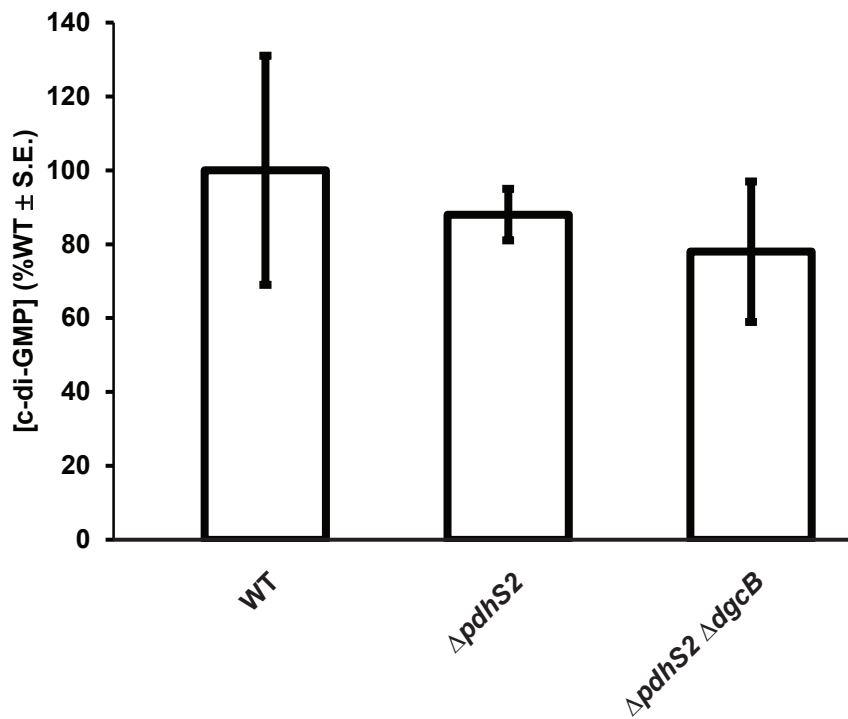

Figure S7

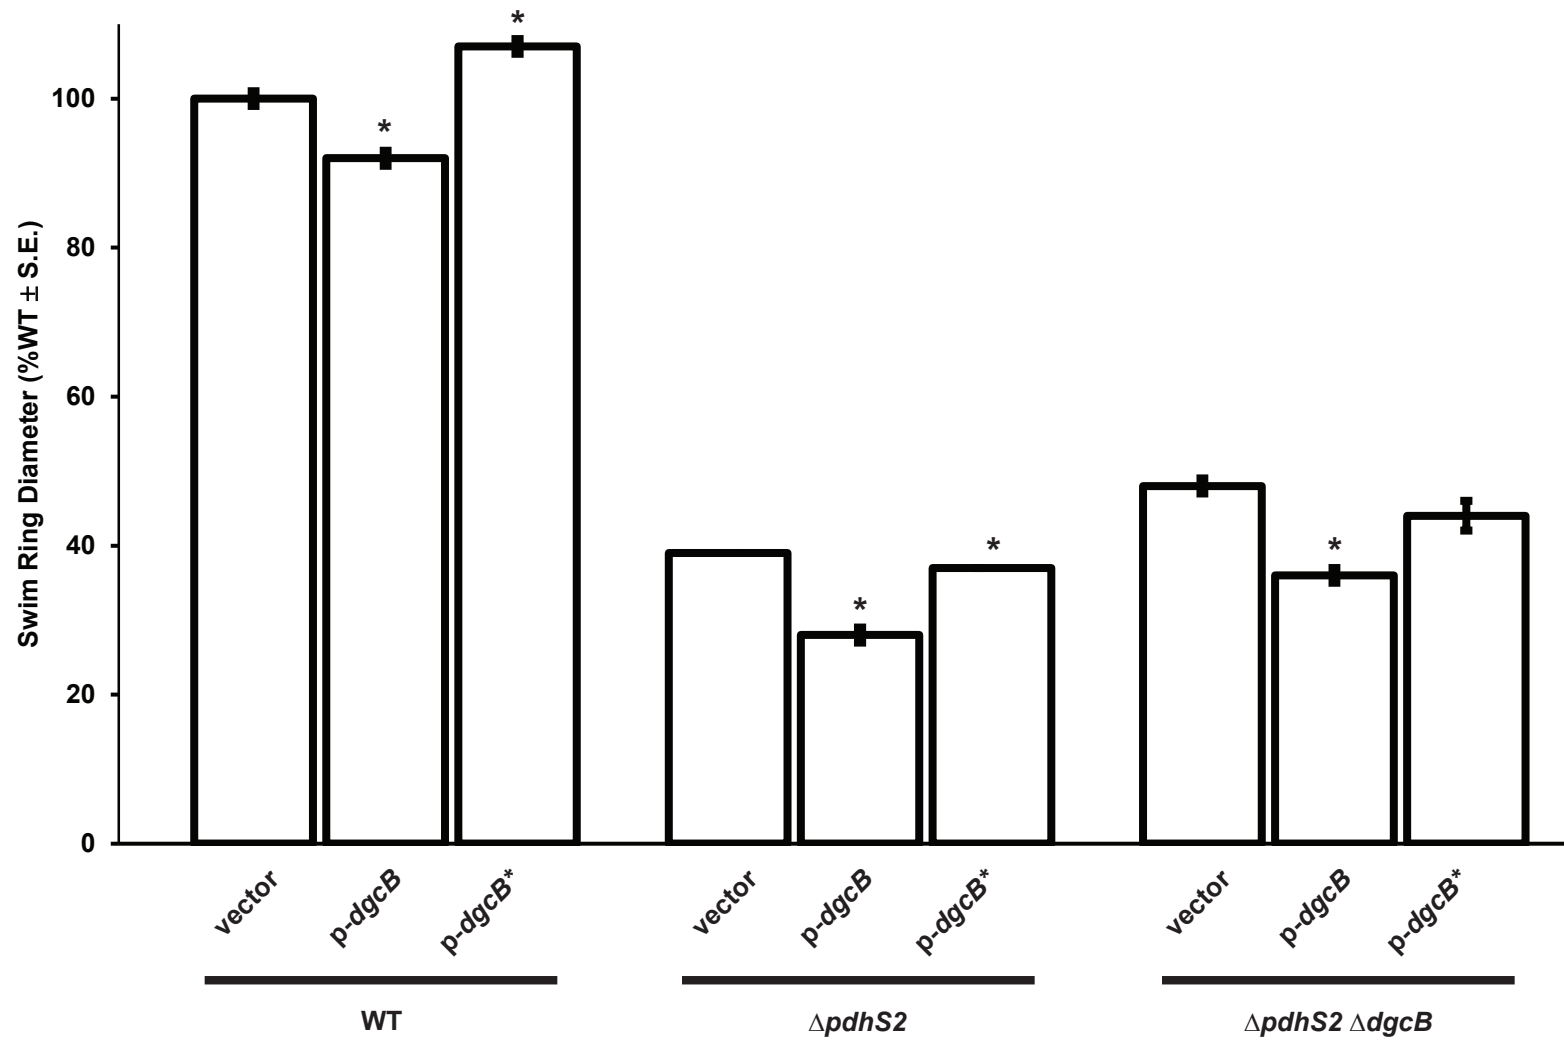

Figure S8

A

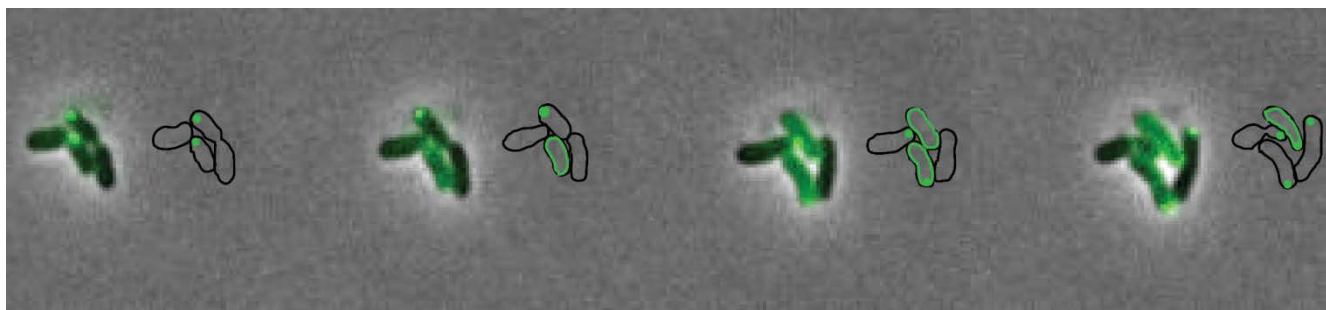

B

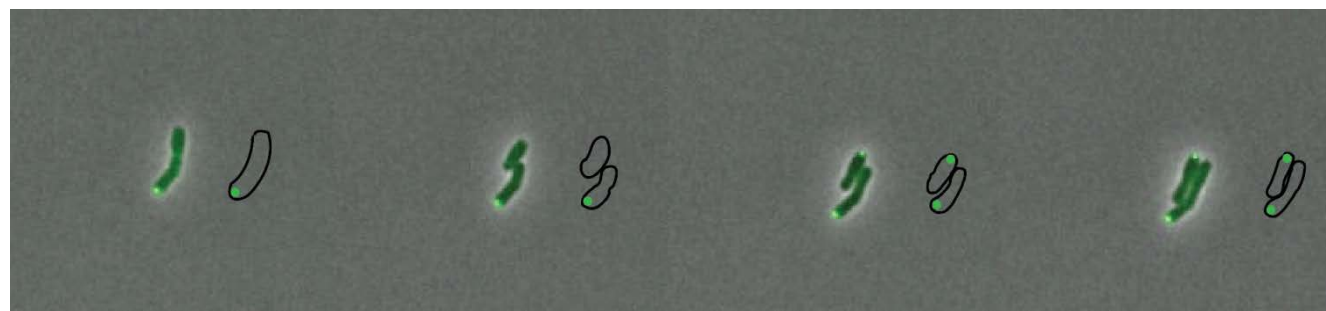

Supplement: mic-165-146-s001.pdf [file mic-165-146-s001.pdf]
